# Supplementary material for: Progress in organic photovoltaics based on green solvents: from solubility enhancement to morphology optimization
Source: Royal Society of Chemistry journal article supplement (doi:10.1039/d3cc04412b), 2023-01-01
Supplement: d3cc04412b1.pdf [file d3cc04412b1.pdf]

Electronic Supplementary Information (ESI) for :

**Progress in organic photovoltaics based on green-solvents: From solubility enhancement to morphology optimization**

Xiangyue Kong, Tian He, Huayu Qiu, Lingling Zhan,\* and Shouchun Yin\*

*Key Laboratory of Organosilicon Chemistry and Materials Technology of Ministry of Education, College of Material, Chemistry and Chemical Engineering, Hangzhou Normal University, 311121 Hangzhou, P. R. China*

E-mail: [linglingzhan@hznu.edu.cn](mailto:linglingzhan@hznu.edu.cn); [yinsc@hznu.edu.cn](mailto:yinsc@hznu.edu.cn)

## Supplementary tables:

Table S1 summary of the advance in *o*-XY processed organic photovoltaics.

| Additive | Active layer                 | Fabrication method     | $V_{oc}$<br>(V) | $J_{sc}$<br>(mA cm <sup>-2</sup> ) | FF<br>(%) | PCE<br>(%) | Ref. |
|----------|------------------------------|------------------------|-----------------|------------------------------------|-----------|------------|------|
| /        | D18:Y6                       | Blade-coating (BHJ)    | 0.777           | 21.52                              | 66.28     | 11.08      | 1    |
| /        | D18:N3                       | Blade-coating (BHJ)    | 0.819           | 22.79                              | 72.55     | 13.54      | 1    |
| /        | D18:Y6-DT                    | Blade-coating (BHJ)    | 0.864           | 21.76                              | 74.46     | 14.00      | 1    |
| DIO      | PM6:BO-4Cl                   | Spin-coating (BHJ)     | 0.838           | 25.80                              | 76.05     | 16.45      | 2    |
| DIO      | PM6/BO-4Cl                   | Spin-coating (LBL)     | 0.838           | 26.48                              | 76.74     | 17.03      | 2    |
| DIO      | PM6/BO-4Cl:L8-BO             | Spin-coating (LBL)     | 0.842           | 27.14                              | 78.28     | 17.89      | 2    |
| DPS      | PM6:TBFCI50-BDD:IT-4F        | Spin-coating (BHJ)     | 0.858           | 20.60                              | 72.40     | 12.80      | 3    |
| DPE      | TPD-3F:IT-4F                 | Spin-coating (BHJ)     | 0.893           | 19.39                              | 67.49     | 11.68      | 4    |
| CN/BTBT  | PM6:Y6                       | Spin-coating (BHJ)     | 0.811           | 26.14                              | 77.30     | 16.37      | 5    |
| CN/DTBDT | PM6:Y6                       | Spin-coating (BHJ)     | 0.798           | 25.28                              | 71.40     | 14.40      | 5    |
| /        | PL1:BTP-eC9-4F               | Spin-coating (BHJ)     | 0.876           | 27.11                              | 76.41     | 18.14      | 6    |
| DIO      | PM6:5BDTBDD:BTP-BO-4Cl       | Spin-coating (BHJ)     | 0.840           | 26.80                              | 77.40     | 17.50      | 7    |
| DIO      | PM6:5BDDBDT:BTP-BO-4Cl       | Spin-coating (BHJ)     | 0.840           | 26.70                              | 77.40     | 17.30      | 7    |
| 2-MN     | PM6:PTer-N25                 | Spin-coating (BHJ)     | 0.940           | 19.52                              | 65.13     | 11.94      | 8    |
| /        | PM6:BO-4Cl:Y6-1O             | Hot spin-coating (BHJ) | 0.851           | 26.75                              | 80.00     | 18.25      | 9    |
| 2-MN     | PM6:PY-DT                    | Spin-coating (BHJ)     | 0.954           | 23.09                              | 77.30     | 17.03      | 10   |
| DIO      | PM6:BTP-eC9                  | Spin-coating (LBL)     | 0.840           | 26.65                              | 78.10     | 17.48      | 11   |
| /        | PTQ10:Y6-BO                  | Aerosol printing       | 0.865           | 25.45                              | 71.18     | 15.65      | 12   |
| 1-MN     | PM6:L14                      | Spin-coating (BHJ)     | 0.950           | 22.10                              | 74.10     | 15.62      | 13   |
| /        | PPDT2FBT:PC <sub>61</sub> BM | Spin-coating (BHJ)     | 0.800           | 15.60                              | 72.00     | 9.20       | 14   |
| DMN      | PM6:Y6                       | Blade-coating (BHJ)    | 0.834           | 24.95                              | 74.55     | 15.51      | 15   |
| AA       | PPDT2FBT:PC <sub>61</sub> BM | Spin-coating (BHJ)     | 0.800           | 15.60                              | 72.00     | 9.20       | 14   |
| DIO      | PPDT2FBT:PC <sub>61</sub> BM | Spin-coating (BHJ)     | 0.800           | 11.80                              | 66.00     | 6.60       | 14   |
| /        | PM6:BTP-EHBO-4F              | Spin-coating (BHJ)     | 0.850           | 26.12                              | 75.78     | 16.82      | 16   |
| /        | PM6:BTP-PHD-4F               | Spin-coating (BHJ)     | 0.870           | 25.64                              | 71.34     | 15.91      | 16   |
| DPE      | P4T2F-HD:Y6-BO               | Spin-coating (BHJ)     | 0.720           | 24.39                              | 75.30     | 13.65      | 17   |
| /        | PM6:YSe-C6                   | Spin-coating (BHJ)     | 0.850           | 25.90                              | 73.00     | 16.10      | 18   |
| /        | PM6:DTY6                     | Spin-coating (BHJ)     | 0.856           | 24.94                              | 75.50     | 16.10      | 19   |
| DIO      | PBTVT:ITOIC-2F               | Spin-coating (BHJ)     | 0.910           | 20.42                              | 59.70     | 11.04      | 20   |
| DIO      | TPD-1:IT-4F                  | Spin-coating (BHJ)     | 0.810           | 19.40                              | 74.70     | 11.70      | 21   |
| DIO      | TPD-2:IT-4F                  | Spin-coating (BHJ)     | 0.810           | 19.60                              | 74.20     | 11.80      | 21   |
| DIO      | TPD-3:IT-4F                  | Spin-coating (BHJ)     | 0.800           | 20.10                              | 75.30     | 12.10      | 21   |

---

|      |                    |                        |       |       |       |       |    |
|------|--------------------|------------------------|-------|-------|-------|-------|----|
| DIO  | TPD-3F:IT-4F       | Spin-coating (BHJ)     | 0.910 | 20.50 | 73.80 | 13.80 | 21 |
| /    | PM6:Y6             | Slot-Die Coating (BHJ) | 0.810 | 26.60 | 70.30 | 15.60 | 22 |
| DMF  | PTB7-Th:PNDI2OD-T2 | Spin-coating (BHJ)     | 0.780 | 11.40 | 57.00 | 5.07  | 23 |
| DMAc | PTB7-Th:PNDI2OD-T2 | Spin-coating (BHJ)     | 0.790 | 14.80 | 52.00 | 6.08  | 23 |
| NMP  | PTB7-Th:PNDI2OD-T2 | Spin-coating (BHJ)     | 0.790 | 12.10 | 54.00 | 5.16  | 23 |
| /    | PM6:IT-4F          | Spin-coating (LBL)     | 0.840 | 20.50 | 75.00 | 12.90 | 24 |
| /    | PM6:IT-4F          | Blade-coating (LBL)    | 0.840 | 20.70 | 71.00 | 12.30 | 24 |

---

Table S2 summary of the advance in Tol processed organic photovoltaics.

| Additive | Active layer                                         | Fabrication method       | $V_{oc}$<br>(V) | $J_{sc}$<br>(mA cm <sup>-2</sup> ) | FF<br>(%) | PCE<br>(%) | Ref. |
|----------|------------------------------------------------------|--------------------------|-----------------|------------------------------------|-----------|------------|------|
| CN       | PBDB-T-b-PYT                                         | Spin-coating (BHJ)       | 0.893           | 20.55                              | 68.35     | 12.54      | 25   |
| /        | D18:L8-BO                                            | Spin-coating (BHJ)       | 0.898           | 25.21                              | 70.96     | 16.10      | 26   |
| /        | DEH-3:L8-BO                                          | Spin-coating (BHJ)       | 0.907           | 26.01                              | 71.13     | 16.80      | 26   |
| /        | DEH-10:L8-BO                                         | Spin-coating (BHJ)       | 0.904           | 25.25                              | 72.09     | 16.50      | 26   |
| /        | DEH-20:L8-BO                                         | Spin-coating (BHJ)       | 0.901           | 26.37                              | 70.81     | 16.80      | 26   |
| PN       | PM7/BTP-eC9                                          | Spin-coating (LBL)       | 0.879           | 24.21                              | 71.63     | 15.20      | 27   |
| PN       | PM7/P(SBDT-Cl):BTP-eC9                               | Spin-coating (LBL)       | 0.879           | 24.70                              | 72.60     | 15.80      | 27   |
| /        | PM6-OEG5:BTP-eC9                                     | Spin-coating (BHJ)       | 0.840           | 27.08                              | 78.00     | 17.74      | 28   |
| DIO      | PM6:BTP-eC9                                          | Spin-coating (BHJ)       | 0.846           | 26.69                              | 75.60     | 17.07      | 29   |
| DIO      | PM6:BTP-eC9                                          | Blade-coating (BHJ)      | 0.840           | 26.37                              | 74.81     | 16.58      | 29   |
| CN       | PM6/PY-V- $\gamma$                                   | Spin-coating (LBL)       | 0.906           | 24.50                              | 76.40     | 17.00      | 30   |
| CN       | PM6:PY-V- $\gamma$                                   | Spin-coating (BHJ)       | 0.913           | 24.30                              | 73.30     | 16.30      | 30   |
| /        | PM6:BO-4Cl:Y6-1O                                     | Hot spin-coating (BHJ)   | 0.848           | 27.17                              | 79.00     | 18.12      | 9    |
| DPE      | PBDTT-DTffBT:PC <sub>71</sub> BM                     | Spin-coating (BHJ)       | 0.880           | 15.15                              | 67.40     | 9.26       | 31   |
| PN       | PM6:M36                                              | Hot spin-coating (BHJ)   | 0.870           | 21.80                              | 74.80     | 15.20      | 32   |
| PN       | PM6:M36:ITCC-M                                       | Hot spin-coating (BHJ)   | 0.880           | 23.20                              | 72.60     | 15.80      | 32   |
| CN       | PBDB-TF:BTIC-2Cl- $\gamma$ CF3                       | Spin-coating (BHJ)       | 0.840           | 25.09                              | 76.99     | 16.31      | 33   |
| CN       | PBDB-TF:BTIC-2Cl- $\gamma$ CF3:PC <sub>71</sub> ThBM | Spin-coating (BHJ)       | 0.850           | 25.76                              | 78.10     | 17.12      | 33   |
| PN       | PBSF-D12:IT-4F                                       | Spin-coating (BHJ)       | 0.920           | 20.50                              | 70.80     | 13.40      | 34   |
| DPE      | PTB7-Th:EH-IDTBR:T2-OEHRH                            | Spin-coating (BHJ)       | 1.040           | 18.05                              | 65.00     | 12.01      | 35   |
| CN       | PM6-Ir1.5:Y6-C2                                      | Spin-coating (BHJ)       | 0.842           | 26.23                              | 74.80     | 16.52      | 36   |
| DPE      | PTh37:ITIC                                           | Spin-coating (BHJ)       | 0.927           | 17.63                              | 66.70     | 10.90      | 37   |
| DPE      | PTh37:ITIC                                           | Spin-coating (BHJ)       | 0.970           | 18.52                              | 67.40     | 12.10      | 37   |
| DPE      | PET52:ITIC                                           | Spin-coating (BHJ)       | 0.976           | 15.74                              | 64.20     | 9.94       | 37   |
| DPE      | PHT53:ITIC                                           | Spin-coating (BHJ)       | 1.010           | 13.69                              | 57.40     | 8.05       | 37   |
| BV       | PM6:BTP-BO-4Cl                                       | Delayed processing (BHJ) | 0.854           | 26.10                              | 77.70     | 17.33      | 38   |
| F4-TCNQ  | FTAZ:IT-M                                            | Spin-coating (BHJ)       | 0.950           | 18.19                              | 70.00     | 12.22      | 39   |

|     |                                |                     |       |       |       |       |    |
|-----|--------------------------------|---------------------|-------|-------|-------|-------|----|
| /   | FTAZ:IT-M                      | Blade-coating (BHJ) | 0.970 | 17.40 | 69.40 | 11.80 | 40 |
| /   | FTAZ:PBDB-T:IT-M               | Blade-coating (BHJ) | 0.950 | 18.10 | 73.60 | 13.20 | 40 |
| DPE | PMTT56:IT-2F                   | Spin-coating (BHJ)  | 0.950 | 18.67 | 71.00 | 12.60 | 41 |
| DPE | PEHTT:IT-2F                    | Spin-coating (BHJ)  | 0.890 | 18.90 | 64.00 | 10.80 | 41 |
| DPE | PMOT39:IT-2F                   | Spin-coating (BHJ)  | 0.900 | 17.84 | 66.00 | 10.50 | 41 |
| /   | DOTFP-Phi:IT-4F                | Spin-coating (BHJ)  | 0.860 | 17.75 | 70.00 | 10.65 | 42 |
| /   | DOTFP-TPD:IT-4F                | Spin-coating (BHJ)  | 0.810 | 18.34 | 67.00 | 10.04 | 42 |
| ODT | P1:ITIC-Th                     | Spin-coating (BHJ)  | 1.010 | 17.89 | 63.00 | 11.39 | 43 |
| /   | PTB7-Th:P1:IEICO-4F            | Spin-coating (BHJ)  | 0.740 | 25.11 | 65.18 | 12.11 | 43 |
| NMP | PBDTTT-EFT:PC <sub>71</sub> BM | Blade-coating (BHJ) | 0.830 | 17.89 | 74.00 | 11.09 | 44 |
| DPE | P12:ITIC                       | Spin-coating (BHJ)  | 0.929 | 13.49 | 64.63 | 8.11  | 45 |
| DPE | P19:ITIC                       | Spin-coating (BHJ)  | 0.938 | 15.68 | 68.03 | 10.01 | 45 |
| DPE | P31:ITIC                       | Spin-coating (BHJ)  | 0.916 | 12.17 | 47.66 | 5.31  | 45 |

Table S3 Summary of the advance in others solvents processed organic photovoltaics.

| Solvent                      | Additive        | Active layer                   | Fabrication method               | V <sub>oc</sub><br>(V) | J <sub>sc</sub><br>(mA<br>cm <sup>-2</sup> ) | FF<br>(%) | PCE<br>(%) | Ref. |
|------------------------------|-----------------|--------------------------------|----------------------------------|------------------------|----------------------------------------------|-----------|------------|------|
| <i>p</i> -XY                 | CN              | PM6:Y6:BT4O                    | Spin-coating (BHJ)               | 0.850                  | 26.03                                        | 72.48     | 16.03      | 46   |
| <i>p</i> -XY                 | CN              | PM6:PM7:Y6:BTO                 | Spin-coating (BHJ)               | 0.860                  | 27.19                                        | 76.05     | 17.78      | 46   |
| <i>p</i> -XY                 | /               | PM6:BO-4Cl:Y6-1O               | Hot spin-coating (BHJ)           | 0.843                  | 27.07                                        | 80.00     | 18.20      | 9    |
| <i>p</i> -XY                 | CN              | PM6:Y6:BTO                     | Spin-coating (BHJ)               | 0.850                  | 26.32                                        | 74.32     | 16.59      | 47   |
| <i>p</i> -XY                 | CN              | PM6:Y6:BTO:PC <sub>71</sub> BM | Spin-coating (BHJ)               | 0.850                  | 27.12                                        | 75.15     | 17.41      | 47   |
| THF                          | /               | BT-2F:N3                       | Spin-coating (Solvent annealing) | 0.838                  | 23.86                                        | 70.68     | 14.13      | 48   |
| THF                          | /               | PE31:BTA5                      | Spin-coating (BHJ)               | 1.110                  | 13.68                                        | 66.40     | 10.08      | 49   |
| THF                          | /               | PE32:BTA5                      | Spin-coating (BHJ)               | 1.100                  | 11.65                                        | 57.73     | 7.40       | 49   |
| THF                          | /               | PE33:BTA5                      | Spin-coating (BHJ)               | 1.160                  | 12.68                                        | 61.13     | 8.99       | 49   |
| THF                          | /               | J52-Cl:BTA5                    | Spin-coating (BHJ)               | 1.210                  | 11.36                                        | 62.86     | 8.64       | 49   |
| THF                          | /               | PTQ10:HO-IDIC-2F               | Spin-coating (LBL)               | 0.905                  | 18.11                                        | 73.40     | 12.03      | 50   |
| THF                          | /               | PTQ10:HO-IDIC-2F               | Blade-coating (LBL)              | 0.892                  | 18.79                                        | 70.69     | 11.85      | 50   |
| THF                          | DIO             | PBDB-TF:BTP-4F-12              | Spin-coating (BHJ)               | 0.853                  | 25.20                                        | 75.00     | 16.10      | 51   |
| 2-MeTHF                      | /               | PTzBI-Si:PRiC39                | Spin-coating (BHJ)               | 0.900                  | 23.10                                        | 69.40     | 14.40      | 52   |
| 2-MeTHF                      | /               | PTzBI-Si:PRoC39                | Spin-coating (BHJ)               | 0.830                  | 22.10                                        | 73.20     | 13.40      | 52   |
| MeTHF                        | /               | PTB-EDOT:ITIC-Th               | Spin-coating (BHJ)               | 0.840                  | 15.37                                        | 66.50     | 8.59       | 53   |
| MeTHF                        | /               | PTB-EDOTS:ITIC-Th              | Spin-coating (BHJ)               | 0.880                  | 16.25                                        | 71.20     | 10.18      | 53   |
| TMB                          | /               | PM6:IT-M/BTP-eC9               | Blade-coating (LBL)              | 0.855                  | 26.34                                        | 76.20     | 17.16      | 54   |
| TMB                          | /               | PBTz-TC:IT-4F                  | Spin-coating (BHJ)               | 0.840                  | 20.61                                        | 71.76     | 12.42      | 55   |
| TMB                          | /               | PBTz-TC/IT-4F                  | Spin-coating (LBL)               | 0.840                  | 20.91                                        | 72.69     | 12.81      | 55   |
| TMB                          | CN              | PMT50:Y6-BO                    | Spin-coating (BHJ)               | 0.842                  | 26.10                                        | 67.70     | 15.30      | 37   |
| TMB                          | DMN             | PTB7-Th:F-NPDI2                | Spin-coating (BHJ)               | 1.100                  | 6.90                                         | 33.00     | 2.50       | 56   |
| TMB                          | /               | PM6:Y6                         | Slot-Die Coating (BHJ)           | 0.800                  | 26.40                                        | 70.90     | 15.40      | 22   |
| 1,2,4-TMB                    | 1-MN            | PM6:L14                        | Spin-coating (BHJ)               | 0.950                  | 20.97                                        | 69.53     | 13.84      | 13   |
|                              | CS <sub>2</sub> | PM6:L14                        | Spin-coating (BHJ)               | 0.950                  | 21.09                                        | 65.17     | 13.03      | 13   |
|                              | CS <sub>2</sub> | BT-2F:N3                       | Spin-coating (Solvent annealing) | 0.845                  | 24.28                                        | 75.02     | 15.39      | 48   |
| <i>o</i> -XY:TMB             | DIO             | PTzBI-dF:CH1007                | Spin-coating (BHJ)               | 0.820                  | 28.15                                        | 77.80     | 18.00      | 57   |
| <i>o</i> -XY:CS <sub>2</sub> | /               | PM6:Y6                         | Spin-coating (BHJ)               | 0.840                  | 25.60                                        | 76.80     | 16.50      | 58   |
| <i>o</i> -XY/THF             | DIO             | PM6/ BO-4F                     | Spin-coating (LBL)               | 0.820                  | 26.20                                        | 74.30     | 16.00      | 59   |
| MA:DPE                       | /               | PTB7-Th:ITIC                   | Spin-coating (BHJ)               | 0.760                  | 11.61                                        | 51.00     | 4.52       | 60   |
| THF:NMP                      | /               | T1:IT-4F                       | Spin-coating (BHJ)               | 0.887                  | 21.10                                        | 76.00     | 14.20      | 61   |

## References

1. M. Sun, K.-N. Zhang, J.-W. Qiao, L.-H. Wang, M. Li, P. Lu, W. Qin, Z. Xiao, L. Zhang, X.-T. Hao, L. Ding and X.-Y. Du, *Adv. Energy Mater.*, 2023, **13**, 2203465.
2. X. Li, H. Yang, X. Du, H. Lin, G. Yang, C. Zheng and S. Tao, *Chem. Eng. J.*, 2023, **452**, 139496.
3. X. Liu, Y. Peng, Z. Liang, L. Wang, S. Han, Z. Dou, X. Lu, J. Tong, J. Liu and J. Li, *J. Mater. Chem. C*, 2023.
4. L. Di Mario, D. G. Romero, M. J. Pieters, F. Eller, C. Zhu, G. Bongiovanni, E. M. Herzig, A. Mura and M. A. Loi, *J. Mater. Chem. A*, 2023, **11**, 2419-2430.
5. X. Li, H. Yang, H. Fan, K. Hu, H. Cao, C. Cui and Y. Li, *J. Mater. Chem. C*, 2023, **11**, 539-545.
6. H. Lu, H. Wang, G. Ran, S. Li, J. Zhang, Y. Liu, W. Zhang, X. Xu and Z. Bo, *Adv. Funct. Mater.*, 2022, **32**, 2203193.
7. H. Xia, Y. Zhang, W. Deng, K. Liu, X. Xia, C.-J. Su, U.-S. Jeng, M. Zhang, J. Huang, J. Huang, C. Yan, W.-Y. Wong, X. Lu, W. Zhu and G. Li, *Adv. Mater.*, 2022, **34**, 2107659.
8. H. Liu, L. Wang, H. Liu, M. Guan, C.-J. Su, U.-S. Jeng, B. Zhao, C. Weng, K. You and X. Lu, *Chem. Eng. J.*, 2022, **429**, 132407.
9. D. Wang, G. Zhou, Y. Li, K. Yan, L. Zhan, H. Zhu, X. Lu, H. Chen and C. Z. Li, *Adv. Funct. Mater.*, 2022, **32**, 2107827.
10. J. Song, Y. Li, Y. Cai, R. Zhang, S. Wang, J. Xin, L. Han, D. Wei, W. Ma, F. Gao and Y. Sun, *Matter*, 2022, **5**, 4047-4059.
11. Y. Zhang, K. Liu, J. Huang, X. Xia, J. Cao, G. Zhao, P. W. Fong, Y. Zhu, F. Yan and Y. Yang, *Nat. Commun.*, 2021, **12**, 4815.
12. P. Yang, T. Zhai, B. Yu, G. Du, B. Mi, X. Zhao and W. Deng, *J. Mater. Chem. A*, 2021, **9**, 17198-17210.
13. B. Liu, H. Sun, J.-W. Lee, J. Yang, J. Wang, Y. Li, B. Li, M. Xu, Q. Liao, W. Zhang, D. Han, L. Niu, H. Meng, B. J. Kim and X. Guo, *Energy Environ. Sci.*, 2021, **14**, 4499-4507.
14. Z. Du, M. Mainville, J. Vollbrecht, A. L. Dixon, N. Schopp, M. Schrock, Z. Peng, J. Huang, S. Chae and H. Ade, *Solar RRL*, 2021, **5**, 2100213.
15. Y. Li, H. Liu, J. Wu, H. Tang, H. Wang, Q. Yang, Y. Fu and Z. Xie, *ACS Appl. Mater. Interfaces*, 2021, **13**, 10239-10248.
16. Y.-J. Su, H. Nie, C.-F. Chang, S.-C. Huang, Y.-H. Huang, T.-W. Chen, K.-K. Hsu, T.-Y. Lee, H.-M. Shih, C.-W. Ko, J.-T. Chen and C.-S. Hsu, *ACS Appl. Mater. Interfaces*, 2021, **13**, 59043-59050.
17. J. Xiao, X. e. Jia, C. Duan, F. Huang, H.-L. Yip and Y. Cao, *Adv. Mater.*, 2021, **33**, 2008158.

18. C. Kim, S. Chen, J. S. Park, G.-U. Kim, H. Kang, S. Lee, T. N.-L. Phan, S.-K. Kwon, Y.-H. Kim and B. J. Kim, *J. Mater. Chem. A*, 2021, **9**, 24622-24630.
19. S. Dong, T. Jia, K. Zhang, J. Jing and F. Huang, *Joule*, 2020, **4**, 2004-2016.
20. H. Lu, P. Jiang, Y. Wei, S. Yuan, Y. Liu, W. Li, X. Xu and Z. Bo, *Solar RRL*, 2020, **4**, 2000547.
21. C.-Y. Liao, Y. Chen, C.-C. Lee, G. Wang, N.-W. Teng, C.-H. Lee, W.-L. Li, Y.-K. Chen, C.-H. Li and H.-L. Ho, *Joule*, 2020, **4**, 189-206.
22. H. Zhao, H. B. Naveed, B. Lin, X. Zhou, J. Yuan, K. Zhou, H. Wu, R. Guo, M. A. Scheel and A. Chumakov, *Adv. Mater.*, 2020, **32**, 2002302.
23. Y. Zou, V. Raveendran and J. Chen, *Nano Energy*, 2020, **77**, 105303.
24. S. Dong, K. Zhang, B. Xie, J. Xiao, H. L. Yip, H. Yan, F. Huang and Y. Cao, *Adv. Energy Mater.*, 2019, **9**, 1802832.
25. Q. Wu, Y. Yu, X. Xia, Y. Gao, T. Wang, R. Sun, J. Guo, S. Wang, G. Xie, X. Lu, E. Zhou and J. Min, *Joule*, 2022, **6**, 2138-2151.
26. Y. Luo, X. Wang, M. Zhang, X. Sun, A. Saparbaev, S. Lei, J. Zhang, B. Xiao, C. Yang, Z. Liu and R. Yang, *Solar RRL*, 2022, **6**, 2200679.
27. S. J. Jeon, N. G. Yang, Y. H. Kim, J. H. Yun and D. K. Moon, *ACS Appl. Mater. Interfaces*, 2022, **14**, 38031-38047.
28. J.-W. Lee, C. Lim, S.-W. Lee, Y. Jeon, S. Lee, T.-S. Kim, J.-Y. Lee and B. J. Kim, *Adv. Energy Mater.*, 2022, **12**, 2202224.
29. J. Zhang, L. Zhang, X. Wang, Z. Xie, L. Hu, H. Mao, G. Xu, L. Tan and Y. Chen, *Adv. Energy Mater.*, 2022, **12**, 2200165.
30. C. Zhao, L. Wang, G. Zhang, Y. Wang, R. Hu, H. Huang, M. Qiu, S. Li and G. Zhang, *Molecules*, 2022, **27**, 5739.
31. Y. Chen, X. Ding, G. Wang, S. Xiao, X. Liu, Z. Zhu, C. Wang and S. Wen, *Trans. Tianjin Univ.*, 2022, **28**, 423-432.
32. B. Du, Y. Ma, C. Guo, J. Cai, D. Li, S. Cheng, D. Liu, Q. Zheng and T. Wang, *Adv. Funct. Mater.*, 2021, **31**, 2105794.
33. H. Chen, H. Lai, Z. Chen, Y. Zhu, H. Wang, L. Han, Y. Zhang and F. He, *Angew. Chem. Int. Ed.*, 2021, **60**, 3238-3246.
34. K. Wang, W. Li, X. Guo, Q. Zhu, Q. Fan, Q. Guo, W. Ma and M. Zhang, *Chem. Mater.*, 2021, **33**, 5981-



5990.

35. T. Lee, S. Oh, S. Rasool, C. E. Song, D. Kim, S. K. Lee, W. S. Shin and E. Lim, *J. Mater. Chem. A*, 2020, **8**, 10318-10330.

36. R. Sun, T. Wang, Z. Luo, Z. Hu, F. Huang, C. Yang and J. Min, *Solar RRL*, 2020, **4**, 2000156.

37. C.-H. Zhang, F. Lin, W. Huang, J. Xin, J. Wang, Z. Lin, W. Ma, T. Yang, J. Xia and Y. Liang, *J. Mater. Chem. C*, 2020, **8**, 11532-11539.

38. X. Xu, L. Yu, H. Yan, R. Li and Q. Peng, *Energy Environ. Sci.*, 2020, **13**, 4381-4388.

39. Y. Xiong, L. Ye, A. Gadisa, Q. Zhang, J. J. Rech, W. You and H. Ade, *Adv. Funct. Mater.*, 2019, **29**, 1806262.

40. H. Hu, L. Ye, M. Ghasemi, N. Balar, J. J. Rech, S. J. Stuard, W. You, B. T. O'Connor and H. Ade, *Adv. Mater.*, 2019, **31**, 1808279.

41. C.-H. Zhang, W. Wang, W. Huang, J. Wang, Z. Hu, Z. Lin, T. Yang, F. Lin, Y. Xing, J. Bai, H. Sun and Y. Liang, *Chem. Mater.*, 2019, **31**, 3025-3033.

42. Q. Liao, K. Yang, J. Chen, C. W. Koh, Y. Tang, M. Su, Y. Wang, Y. Yang, X. Feng and Z. He, *ACS Appl. Mater. Interfaces*, 2019, **11**, 31119-31128.

43. Y. Tang, H. Sun, Z. Wu, Y. Zhang, G. Zhang, M. Su, X. Zhou, X. Wu, W. Sun and X. Zhang, *Adv. Sci.*, 2019, **6**, 1901773.

44. S.-H. Chen, C. H. Liao, C. Y. Chang, K. M. Huang, J. Y. Chen, C. H. Chen, H.-F. Meng, H.-W. Zan, S.-F. Horng, Y.-C. Lin and M.-H. Yeh, *Org. Electron.*, 2019, **75**, 105376.

45. U. K. Aryal, S. S. Reddy, K. Kranthiraja, J. Kim, W. Cho, M. Song and S.-H. Jin, *ACS Appl. Energy Mater.*, 2019, **2**, 4159-4166.

46. W. Sun, H. Chen, B. Zhang, Q. Cheng, H. Yang, Z. Chen, G. Zeng, J. Ding, W. Chen and Y. Li, *Chin. J. Chem.*, 2022, **40**, 2963-2972.

47. H. Chen, R. Zhang, X. Chen, G. Zeng, L. Kobera, S. Abbrent, B. Zhang, W. Chen, G. Xu and J. Oh, *Nat. Energy*, 2021, **6**, 1045-1053.

48. J. Ge, L. Hong, W. Song, L. Xie, J. Zhang, Z. Chen, K. Yu, R. Peng, X. Zhang and Z. Ge, *Adv. Energy Mater.*, 2021, **11**, 2100800.

49. T. Dai, P. Lei, B. Zhang, A. Tang, Y. Geng, Q. Zeng and E. Zhou, *ACS Appl. Mater. Interfaces*, 2021, **13**, 21556-21564.

50. H. Huang, X. Li, C. Sun, I. Angunawela, B. Qiu, J. Du, S. Qin, L. Meng, Z. Zhang and H. Ade, *J. Mater.*

*Chem. C*, 2020, **8**, 7718-7724.

51. L. Hong, H. Yao, Z. Wu, Y. Cui, T. Zhang, Y. Xu, R. Yu, Q. Liao, B. Gao and K. Xian, *Adv. Mater.*, 2019, **31**, 1903441.

52. T. Jia, J. Zhang, H. Tang, J. Jia, K. Zhang, W. Deng, S. Dong and F. Huang, *Chem. Eng. J.*, 2022, **433**, 133575.

53. C. Liao, M. Zhang, X. Xu, F. Liu, Y. Li and Q. Peng, *J. Mater. Chem. A*, 2019, **7**, 716-726.

54. Y. Li, J. Wu, H. Tang, X. Yi, Z. Liu, Q. Yang, Y. Fu, J. Liu and Z. Xie, *ACS Appl. Mater. Interfaces*, 2022, **14**, 31054-31065.

55. J. Deng, S. Huang, J. Liu, D. Zhou, L. Zhao, L. Liu, B. Huang, Y. Cheng, C. Yang, F. Wu and L. Chen, *Chem. Eng. J.*, 2022, **443**, 136515.

56. A. Laventure, S. Stanzel, A.-J. Payne, B. H. Lessard and G. C. Welch, *Synth. Met.*, 2019, **250**, 55-62.

57. B. Fan, F. Lin, J. Oh, H. Fu, W. Gao, Q. Fan, Z. Zhu, W. J. Li, N. Li and L. Ying, *Adv. Energy Mater.*, 2021, **11**, 2101768.

58. X. Song, P. Sun, D. Sun, Y. Xu, Y. Liu and W. Zhu, *Nano Energy*, 2022, **91**, 106678.

59. J. Wan, L. Zeng, X. Liao, Z. Chen, S. Liu, P. Zhu, H. Zhu and Y. Chen, *Adv. Funct. Mater.*, 2022, **32**, 2107567.

60. S. H. Park, I. S. Jin, H. Ahn and J. W. Jung, *Org. Electron.*, 2020, **86**, 105893.

61. Y. Cui, H. Yao, L. Hong, T. Zhang, Y. Xu, K. Xian, B. Gao, J. Qin, J. Zhang and Z. Wei, *Adv. Mater.*, 2019, **31**, 1808356.
